# Supplementary material
Source: Springer Nature journal article supplement (https://www.springermedizin.de/resource/supplementary/12884_2014_1161_MOESM2_ESM.pdf/9459062)

◆ hunger movements

■ no hunger movements

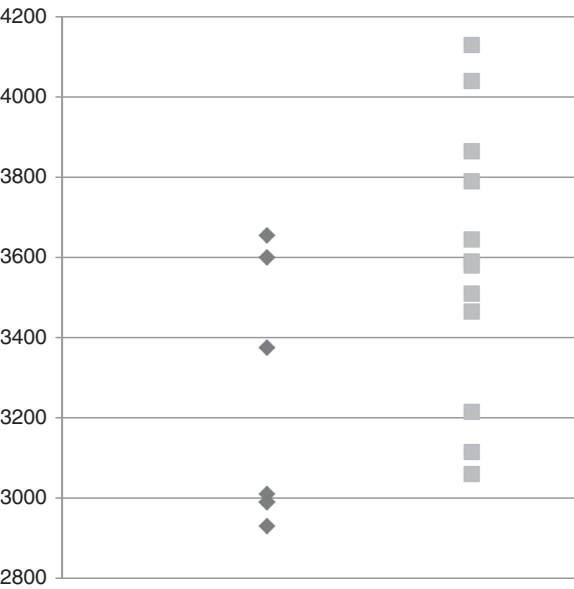

Supplement: MOESM2 [file 9459062]
